# Supplementary material
Source: publisher figshare collection journal article supplement (https://acs.figshare.com/ndownloader/files/4088278)
Supplement: Supplementary file 1 [file 4088278]

Supporting Information for:

## A Comparison of the Behavior of Single Crystalline and Nanowire Array ZnO Photoanodes

Anthony Fitch, Nicholas C. Strandwitz, Bruce S. Brunschwig, and Nathan S. Lewis\*

*Beckman Institute and Kavli Nanoscience Institute*

*Division of Chemistry and Chemical Engineering*

*210 Noyes Laboratory, 127-72*

*California Institute of Technology*

*Pasadena, CA 91125*

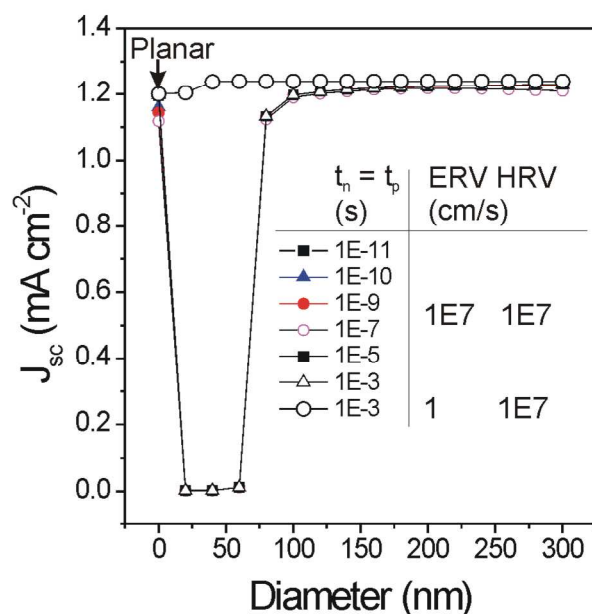

**Figure S1.** Simulated short circuit current densities under 1-sun illumination for ZnO nanowires with varying diameter, electron and hole lifetime, and interfacial electron and hole recombination velocities. Despite long carrier lifetimes of 1 ms large  $J_{sc}$  values are not observed in wires with  $d < 75$  nm. However, when the electron recombination velocity is reduced, simulating a ‘hole-selective’ contact characteristic of dye-sensitized solar cells, large  $J_{sc}$  values are obtained even at small wire diameters where very little electric field is present (See **Figure S2**).

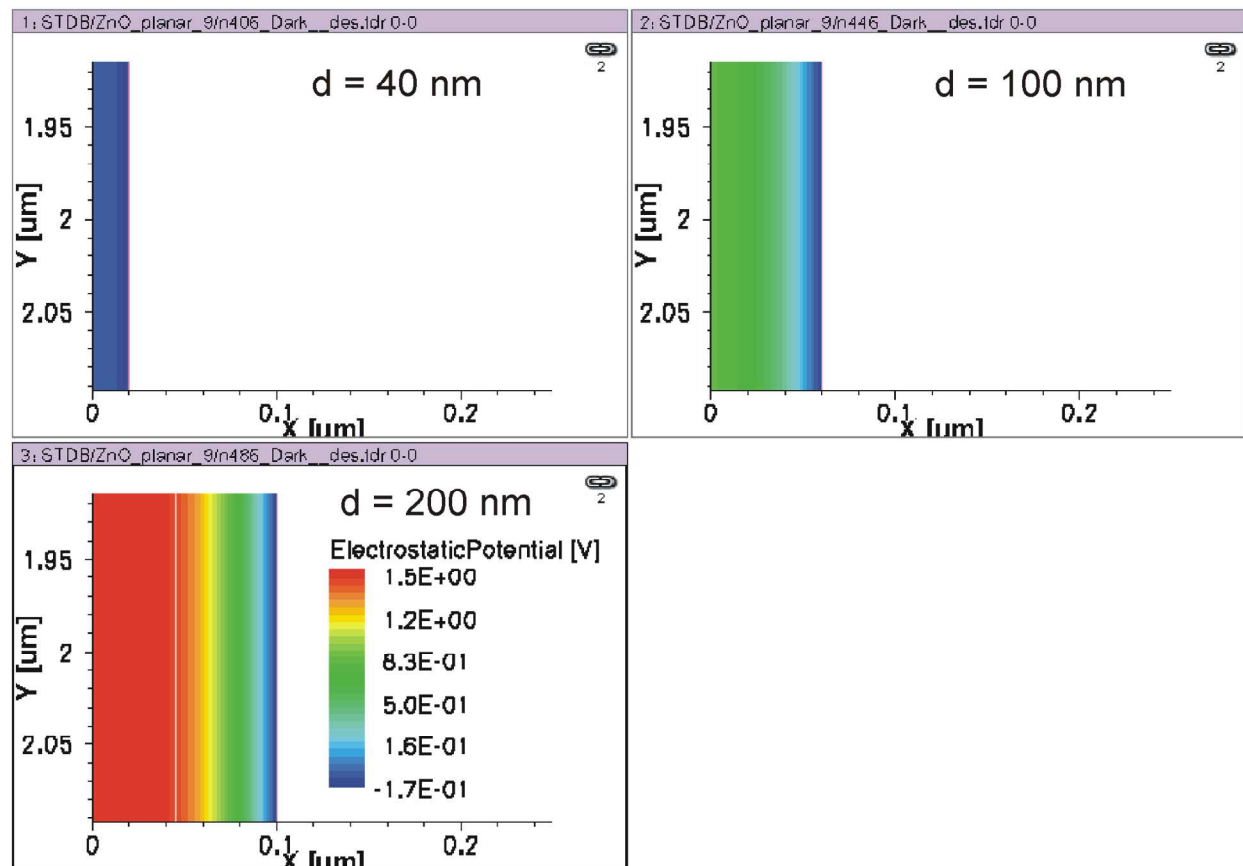

**Figure S2.** Simulated electrostatic potential in the dark, plotted vs. spatial coordinates of cross-sections of one half of ZnO nanowires with diameters of 40 nm, 100 nm, and 200 nm.

**Table S1.** Parameters for the device physics simulation

| Parameter                       | Value                                              |
|---------------------------------|----------------------------------------------------|
| Band Gap                        | 3.3 (eV)                                           |
| Electron Affinity               | 3.7 (eV)                                           |
| Electron DOS                    | $4.0E18$ ( $\text{cm}^{-3}$ )                      |
| Hole DOS                        | $1.8E19$ ( $\text{cm}^{-3}$ )                      |
| Electron Mobility               | $50$ ( $\text{cm}^2 \text{V}^{-1} \text{s}^{-1}$ ) |
| Hole Mobility                   | $10$ ( $\text{cm}^2 \text{V}^{-1} \text{s}^{-1}$ ) |
| Electron lifetime               | $1E-9$ (s)                                         |
| Hole lifetime                   | $1E-9$ (s)                                         |
| Electron Recombination Velocity | $1E7$ ( $\text{cm s}^{-1}$ )                       |
| Hole Recombination Velocity     | $1E7$ ( $\text{cm s}^{-1}$ )                       |

Index of refraction data and absorption coefficient data were taken from Ref 1.

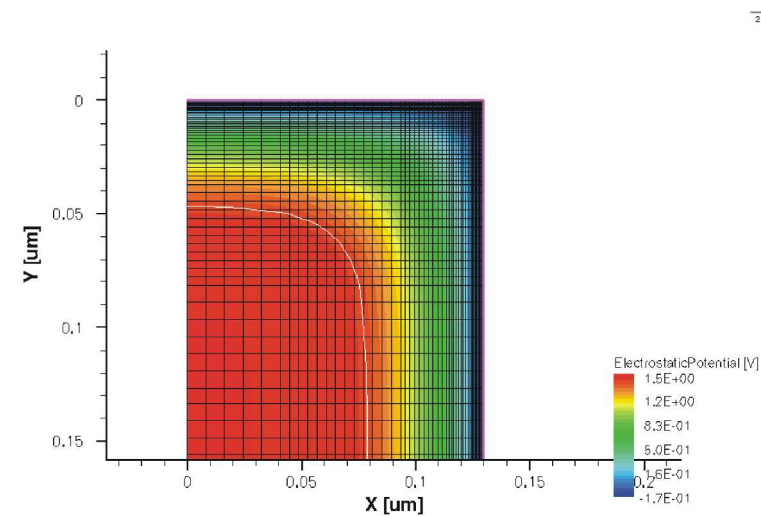

**Figure S4.** Example of the simulation mesh used in device physics simulations.

#### References:

- (1) Yoshikawa, H.; Adachi, S. *Japanese Journal of Applied Physics* **1997**, 36, 6237.

#### Complete Reference 2:

2. Boettcher, S. W.; Warren, E. L.; Putnam, M. C.; Santori, E. A.; Turner-Evans, D.; Kelzenberg, M. D.; Walter, M. G.; McKone, J. R.; Brunschwig, B. S.; Atwater, H. A.; Lewis, N.S., *J. Am. Chem. Soc.* **2011**, 133, 1216-1219.
